# Supplementary material for: Silica-anchored organotin trichloride: a recyclable and clean organotin catalyst for transesterification reactions
Source: Royal Society of Chemistry journal article supplement (doi:10.1039/c3dt50292a), 2013-01-01
Supplement: c3dt50292a.pdf [file c3dt50292a.pdf]

## Electronic Supplementary Information

# Silica-anchored Organotin Trichloride: A Recyclable and Clean Organotin Catalyst for Transesterification Reactions

Thierry Toupance,<sup>\*a</sup> Laetitia Renard,<sup>a</sup> Bernard Jousseume,<sup>a</sup> Céline Olivier,<sup>a</sup> Vanja Pinoie,<sup>b</sup> Ingrid Verbruggen,<sup>b</sup> Rudolph Willem<sup>b</sup>

<sup>a</sup> University of Bordeaux, Institut des Sciences Moléculaires, ISM UMR 5255 CNRS, C2M group, 33405 Talence Cédex, France. Fax: + 33 5 40006994; Tel: + 33 5 40002523; E-mail: [t.toupance@ism.u-bordeaux1.fr](mailto:t.toupance@ism.u-bordeaux1.fr)

<sup>b</sup> High Resolution NMR Centre (HNMR), Department of Materials and Chemistry (MACH), Vrije Universiteit Brussel (UVB), Pleinlaan 2, B-1050 Brussels, Belgium.

### Solution <sup>1</sup>H and <sup>13</sup>C NMR spectroscopy

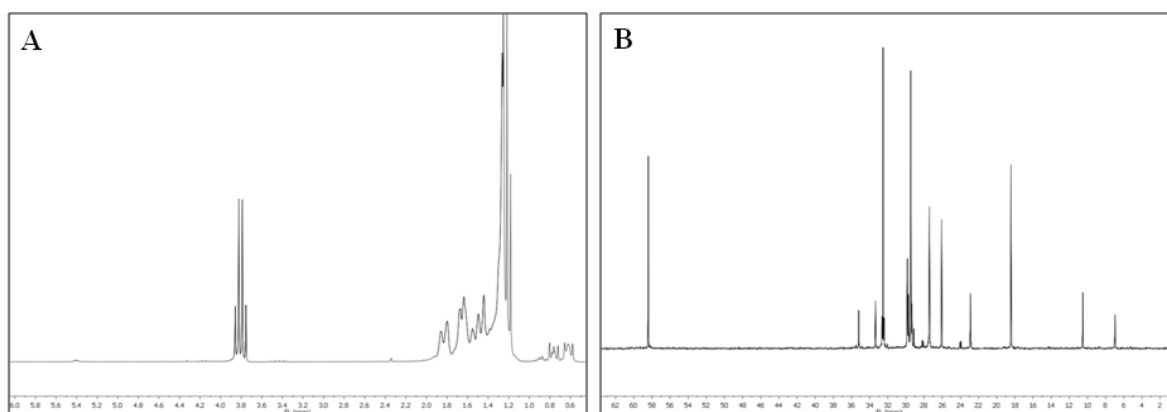

Figure S1: Solution <sup>1</sup>H (A) and <sup>13</sup>C (B) NMR spectra of precursor 2 recorded in CDCl<sub>3</sub>

## Solid-state $^{117}\text{Sn}$ MAS NMR spectroscopy

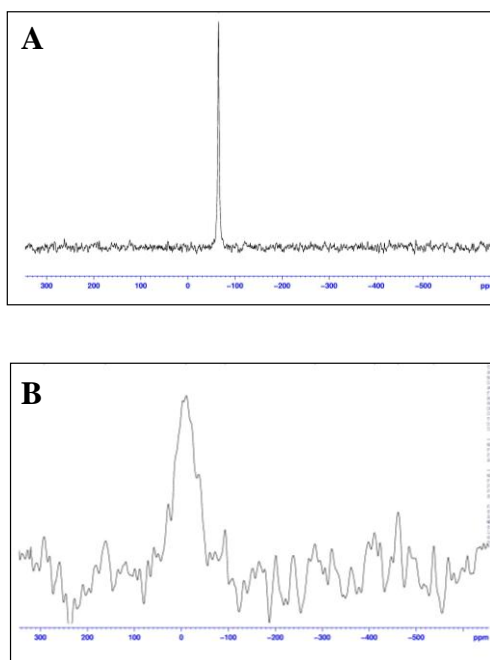

**Figure S2:** Solid-state  $^{117}\text{Sn}$  MAS NMR spectra of hybrid material **3** (A) and hybrid catalyst **4** (B).

## FTIR spectroscopy

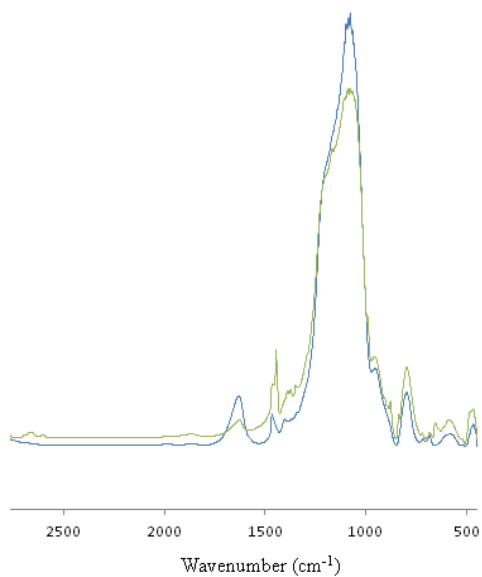

**Figure S3:** FTIR spectra (2500-400  $\text{cm}^{-1}$  region) of hybrid material **3** (green) and hybrid catalyst **4** (blue).

### Determination of the amount of precursor 2 included in hybrid material 3

Assuming that  $x$  is the amount of precursor 2 included in the inorganic network, complete thermolysis of hybrid material 3 should give  $(4 + x)$  moles of  $\text{SiO}_2$  and  $x$  moles of  $\text{SnO}_2$ . According to  $^{29}\text{Si}$  MAS NMR studies, neither hydrolysis nor condensation is complete (presence of  $\text{T}^2$  and  $\text{Q}^3$  sites). A hydroxyl group has been added to the starting silica mass and  $0.5x$  mole of ethoxyl group has been added to the mass of the organotin precursor. Consequently, the mass loss determined by TGA recorded under air can be written as:

$$\text{Mass Loss (\%)} = \frac{(4 * M(\text{SiO}_2 * 2.5) + xM(\text{precursor})) - [(4+x)M(\text{SiO}_2) + xM(\text{SnO}_2)]}{4 * M(\text{SiO}_2 * 2.5) + xM(\text{precursor})}$$

The corresponding  $x$  value for hybrid materials 3, 3a and 3b are gathered in Table S1.

| Material | Mass Loss (%) | $x$ value | Proposed Chemical Formula                                                   |
|----------|---------------|-----------|-----------------------------------------------------------------------------|
| 3        | 43.0          | 0.7       | $\text{C}_{23.9}\text{H}_{47.5}\text{O}_{11}\text{Si}_{4.7}\text{Sn}_{0.7}$ |
| 3a       | 44.5          | 0.8       | $\text{C}_{25}\text{H}_{48}\text{O}_{12}\text{Si}_{4.8}\text{Sn}_{0.8}$     |
| 3b       | 41.0          | 0.6       | $\text{C}_{19}\text{H}_{37}\text{O}_{11.3}\text{Si}_{4.6}\text{Sn}_{0.6}$   |

Table S1: Chemical formula proposed for hybrid materials 3, 3a and 3b.

The chemical formula given for hybrid catalyst 4 in Table 1 was therefore inferred from microanalysis data by considering  $\text{Si/Sn} = 4.7/0.7$ .
